# Supplementary material for: High resolution porewater profiling of methylmercury with a novel equilibrium passive sampler
Source: Royal Society of Chemistry journal article supplement (doi:10.1039/d5va00492f), 2026-01-01
Supplement: d5va00492f2.xlsx [file d5va00492f2.xlsx]

## Sheet: Full Table
Sediment	Rep	Matrix	x1 (cm)	[MeHg]PS (ng/kg, 0.5 cm res)	x2 (cm)	[MeHg]PS (ng/kg, 1 cm res)	[THg]sed (ng/kg)	[THg]aq (ng/L)	[MeHg]sed (ng/kg)	[MeHg]aq (ng/L)	DOC (mg/L)	Sulfide (uM)	pH	Csed/Cw (L/kg)	Cps/Cw (L/kg)	x3 (cm)	Fe (uM)	Mn (uM)	S (uM)	Cl (uM)	SO4 (uM)	NO3 (uM)
Estuarine	a	initials o.water									2.39	0.422815	7.43							34894.1	2285.68	391.54
Estuarine	b	initials o.water									2.518	0.466381	7.31							24270.9	1106.6	208.34
Estuarine	c	initials o.water									2.17	0.480669	7.32							28176.8	1410.04	221.58
Freshwater	b	initials o.water									3.156	0.151559	6.32							625.575	122.421	21.963
Freshwater	a	initials o.water									3.214	0.134327	6.54							872.643	169.281	23.301
Freshwater	c	initials o.water									3.386	0.152707	6.58							914.412	170.541	22.908
Estuarine	a	initials sed/pw						365.046	32207.8	2.0173	29.368	0.413353	7.21	15965.8						132619	4719.06	968.3
Estuarine	b	initials sed/pw						253.719	37705.3	1.24054	28.244	0.342307	7.29	30394.4						150070	6026.36	673.38
Estuarine	c	initials sed/pw						387.573	40355.9	1.38645	28.192	0.401067	7.22	29107.3						97672.1	2870.24	911.34
Freshwater	a	initials sed/pw						121.698	6827.44	0.529891	11.864	0.194401	3.92	12884.6						10773.5	2264.86	68.001
Freshwater	b	initials sed/pw						137.181	8998.82	0.557201	16.388	0.277128	3.91	16150						9640.59	1488.46	28.281
Freshwater	c	initials sed/pw						69.5222	6891.63	0.604051	14.92	0.247479	4.11	11409						12211.3	4809.66	34.884
Estuarine	A2	o. water	-0.75	64.6396	-0.5	44.5585		19.9531		0.0980521	7.1382	0	8.2		454.437	-1	-0.0184907	0.0105495	2415.6	46018.6	1499.82	354.1
Estuarine	A2	o. water	-0.25	24.4774
Estuarine	A2	sed/pw	0.25	432.236	0.5	1176.59	1.02555e+07	387.387	62164.6	2.00117	20.2372	0.509394	7.1	31064.1	587.949	1	121.432	26.6036	1863.15	45159	1103.44	478.48
Estuarine	A2	sed/pw	0.75	1920.94
Estuarine	A2	sed/pw	1.25	10181.6	1.5	14718.9	9.56513e+06		62021.5	10.7589	25.7822	1.06314	7.1	5764.66	1368.07
Estuarine	A2	sed/pw	1.75	19256.3
Estuarine	A2	sed/pw	2.25	24163.8	2.5	25215.8	1.03596e+07		59689.4	12.4231	30.0772	2.14747	6.98	4804.7	2029.75	3	238.71	39.0812	892.43	84337.5	1364.96	830.66
Estuarine	A2	sed/pw	2.75	26267.8
Estuarine	A2	sed/pw	3.25	34146.8	3.5	33703.8	9.8023e+06	168.35	61756.2	12.9098	38.5322	2.78959	6.98	4783.66	2610.71
Estuarine	A2	sed/pw	3.75	33260.9
Estuarine	A2	sed/pw	4.25	34056.4	4.5	32221.3		163.176	50761	14.0467	35.9472	3.15352	7.12	3613.72	2293.86	5	173.386	41.2089	177.228	53973.2	121.34	620.86
Estuarine	A2	sed/pw	4.75	30386.1
Estuarine	A2	sed/pw	5.25	29319.9	5.5	26427.4		165.212	54856.1	10.143	45.4422	2.3304	7.12	5408.27	2605.49
Estuarine	A2	sed/pw	5.75	23535
Estuarine	A2	sed/pw	6.25	24264.5	6.5	25128.5		183.149	54787.3	8.88753	43.8822	1.39237	7.24	6164.52	2827.39	7	209.863	43.6204	119.843	80416.1	90.06	913.52
Estuarine	A2	sed/pw	6.75	25992.5
Freshwater	B1	o. water	-0.75	125.616	-0.5	111.723		7.10701		0.195509	6.8182	0	6.55		571.446	-1	2.04099	3.76207	299.396	3401.75	167.736	43.338
Freshwater	B1	o. water	-0.25	97.8302
Freshwater	B1	sed/pw	0.25	342.713	0.5	1182.58	3.08657e+06	1432.02	15304.9	11.6262	25.8622	1.27638	6.45	1316.41	101.717	1	891.006	16.6547	174.632	4435.64	101.943	24.327
Freshwater	B1	sed/pw	0.75	2022.45
Freshwater	B1	sed/pw	1.25	17143.4	1.5	24136.3	2.08284e+06		11044.3	12.8748	48.4122	2.82248	6.45	857.823	1874.69
Freshwater	B1	sed/pw	1.75	31129.2
Freshwater	B1	sed/pw	2.25	20996.1	2.5	18970.1	2.81787e+06	1229.97	12610.5	13.3487	70.7622	2.39011	6.58	944.702	1421.12	3	2112.78	27.9004	133.153	4833.96	18.759	23.727
Freshwater	B1	sed/pw	2.75	16944.1
Freshwater	B1	sed/pw	3.25	15301.2	3.5	14577.9	3.78322e+06	883.965	15799.2	10.9163	81.7622	3.30796	6.58	1447.3	1335.43
Freshwater	B1	sed/pw	3.75	13854.6
Freshwater	B1	sed/pw	4.25	14876.5	4.5	14479.4	3.4916e+06	803.452	14696.6	10.4182	94.2122	3.25834	6.68	1410.67	1389.82	5	2653.18	37.1739	172.85	6405.04	14.103	66.732
Freshwater	B1	sed/pw	4.75	14082.3
Freshwater	B1	sed/pw	5.25	13423.4	5.5	13024.5	2.88214e+06	607.195	13987.1	8.45803	104.962	2.71781	6.68	1653.7	1539.9
Freshwater	B1	sed/pw	5.75	12625.6
Freshwater	B1	sed/pw	6.25	12388.2	6.5	13217.2	2.90641e+06	510.069	13839.7	8.67061	106.162	2.51997	6.73	1596.16	1524.36	7	2717.96	39.502	180.311	7248.07	14.085	77.019
Freshwater	B1	sed/pw	6.75	14046.1
Estuarine	A3	o. water	-0.75	227.298	-0.5	306.782		11.6963		0.0939056	6.3402		8.34		3266.92	-1	-0.070869	0.007269	2277.12	84905.5	3460.64	422.04
Estuarine	A3	o. water	-0.25	386.267
Estuarine	A3	sed/pw	0.25	4209.27	0.5	20687	9.12634e+06	242.277	52557.5	1.2106	14.8222	0	7.3	43414.5	17088.2	1	83.7355	23.843	1953.08	65267.8	2034.7	639.78
Estuarine	A3	sed/pw	0.75	37164.7
Estuarine	A3	sed/pw	1.25	29653.3	1.5	28354.3		363.18	55994	11.2286	19.5272	2.35426	7.3	4986.73	2525.18
Estuarine	A3	sed/pw	1.75	27055.4
Estuarine	A3	sed/pw	2.25	25271.3	2.5	27590.3		801.087	55351.3	15.4533	24.8272	5.01293	7.06	3581.84	1785.4	3	261.556	33.7891	968.23	65185.6	988.84	657.8
Estuarine	A3	sed/pw	2.75	29909.4
Estuarine	A3	sed/pw	3.25	30634.3	3.5	28935.8		346.502	53132.1	12.0756	30.6722	6.38451	7.06	4399.94	2396.21
Estuarine	A3	sed/pw	3.75	27237.3
Estuarine	A3	sed/pw	4.25	27136.9	4.5	26859.6		248.91	51413.8	12.5405	30.8572	7.59666	7.28	4099.81	2141.82	5	185.925	42.6391	217.532	83628.1	196.08	915.68
Estuarine	A3	sed/pw	4.75	26582.3
Estuarine	A3	sed/pw	5.25	27030.7	5.5	25376.3		241.142	58038.2	12.4679	39.1622	6.28873	7.28	4655.03	2035.34
Estuarine	A3	sed/pw	5.75	23721.9
Estuarine	A3	sed/pw	6.25	20693.6	6.5	22676.8		387.106	55567.5	11.5393	44.9072	5.40649	7.39	4815.51	1965.19	7	200.107	43.2166	140.395	68138.3	95	793.5
Estuarine	A3	sed/pw	6.75	24660.1
Freshwater	B2	o. water	-0.75	85.0374	-0.5	93.5639		5.5823		0.156425	6.3082		6.61		598.141	-1	1.05496	6.98337	364.256	3480.27	225.573	29.535
Freshwater	B2	o. water	-0.25	102.09
Freshwater	B2	sed/pw	0.25	1782.68	0.5	10686.4	2.90997e+06	896.792	15212.8	8.50494	21.9122	0	6.55	1788.7	1256.49	1	895.965	17.4205	230.584	4330.36	130.359	24.315
Freshwater	B2	sed/pw	0.75	19590.1
Freshwater	B2	sed/pw	1.25	22355.5	1.5	22077.5		1274.15	9805.91	12.7218	49.8622	1.5772	6.55	770.799	1735.41
Freshwater	B2	sed/pw	1.75	21799.5
Freshwater	B2	sed/pw	2.25	17510.6	2.5	16595.5		687.097	16068.2	10.9058	67.7622	2.05481	6.73	1473.36	1521.71	3	2181.19	29.3159	130.39	4954.94	17.979	26.676
Freshwater	B2	sed/pw	2.75	15680.3
Freshwater	B2	sed/pw	3.25	14409.5	3.5	14474		775.403	13215.8	9.80108	86.9622	2.18288	6.73	1348.4	1476.77
Freshwater	B2	sed/pw	3.75	14538.4
Freshwater	B2	sed/pw	4.25	12571.9	4.5	13152.9		678.049	14173.7	9.81722	97.2122	1.94892	6.65	1443.76	1339.78	5	2738.01	38.2455	170.878	6253.51	16.659	62.787
Freshwater	B2	sed/pw	4.75	13733.9
Freshwater	B2	sed/pw	5.25	13686.9	5.5	13624.8		655.096	15160.5	5.95706	102.312	1.9786	6.65	2544.96	2287.16
Freshwater	B2	sed/pw	5.75	13562.7
Freshwater	B2	sed/pw	6.25	13279.7	6.5	14254		427.824	12061.7	6.83617	110.462	1.91968	6.48	1764.39	2085.08	7	2919.21	41.4035	182.542	7008.78	15.12	28.425
Freshwater	B2	sed/pw	6.75	15228.2
Estuarine	A4	o. water	-0.75	423.522	-0.5	413.196		13.108		0.0783491	7.2942	0	8.35		5273.78	-1	-0.0209146	0.00366135	2566.65	61194.3	2156.84	239.38
Estuarine	A4	o. water	-0.25	402.87
Estuarine	A4	sed/pw	0.25	1581.95	0.5	7839.2	8.37649e+06	105.568	56883.9	1.05775	12.1322	0	7.22	53778.1	7411.18	1	88.5194	24.2825	2067.94	67247.6	2106.46	663.24
Estuarine	A4	sed/pw	0.75	14096.4
Estuarine	A4	sed/pw	1.25	23368.5	1.5	24664.3		418.307	68256.1	9.92804	17.2072	1.77994	7.22	6875.09	2484.31
Estuarine	A4	sed/pw	1.75	25960.1
Estuarine	A4	sed/pw	2.25	23335.1	2.5	24848.1		294.326	58478.6	16.985	24.8422	3.87696	7.02	3442.96	1462.95	3	268.841	38.1304	1025.31	47192.1	541.54	384.56
Estuarine	A4	sed/pw	2.75	26361.2
Estuarine	A4	sed/pw	3.25	29079.2	3.5	26826.1		320.232	58292.1	16.2672	30.6772	5.96467	7.02	3583.41	1649.09
Estuarine	A4	sed/pw	3.75	24573.1
Estuarine	A4	sed/pw	4.25	25706.6	4.5	26339.3		257.792	59413.5	13.2613	38.1322	7.31494	7.04	4480.23	1986.18	5	189.799	44.475	245.885	58399	151.24	661.14
Estuarine	A4	sed/pw	4.75	26971.9
Estuarine	A4	sed/pw	5.25	24323.3	5.5	24049.8		217.976	58825.4	11.7368	37.7122	5.28528	7.04	5012.05	2049.1
Estuarine	A4	sed/pw	5.75	23776.4
Estuarine	A4	sed/pw	6.25	19712.5	6.5	21533.6		275.355	52561	11.6657	40.6572		7.23	4505.58	1845.89	7	55.2643	40.694	116.628	73079.5	91.52	824.72
Estuarine	A4	sed/pw	6.75	23354.8
Freshwater	B3	o. water	-0.75	57.8326	-0.5	53.7637		4.89717		0.0400205	5.6102	0	5.41		1343.4	-1	2.01787	11.6796	439.518	4563.26	271.509	52.257
Freshwater	B3	o. water	-0.25	49.6948
Freshwater	B3	sed/pw	0.25	281.45	0.5	1825.74	1.1786e+06	161.337	7438.68	2.77277	7.0572	0	6.27	2682.76	658.455	1	447.493	15.51	361.868	4733.99	268.59	36.243
Freshwater	B3	sed/pw	0.75	3370.04
Freshwater	B3	sed/pw	1.25	19862.1	1.5	18787.3		962.184	9390.12	9.38083	19.9622	1.96488	6.27	1000.99	2002.73
Freshwater	B3	sed/pw	1.75	17712.4
Freshwater	B3	sed/pw	2.25	13595.1	2.5	12904.8		1165.44	11915.4	11.0378	40.5122	3.91274	6.49	1079.51	1169.15	3	1462.61	22.4514	137.82	5164.4	47.565	36.825
Freshwater	B3	sed/pw	2.75	12214.5
Freshwater	B3	sed/pw	3.25	9988.63	3.5	9643.53		677.981	11362.2	10.6812	53.8622	4.03864	6.49	1063.76	902.851
Freshwater	B3	sed/pw	3.75	9298.42
Freshwater	B3	sed/pw	4.25	9953.98	4.5	9823.71		629.843	13441.7	8.76414	69.8622	3.50221	6.64	1533.72	1120.9	5	2261.22	32.4353	147.833	5915.9	25.176	37.767
Freshwater	B3	sed/pw	4.75	9693.44
Freshwater	B3	sed/pw	5.25	8931.12	5.5	8944.48		781.187	13154.5	7.9266	78.2122	3.44719	6.64	1659.54	1128.41
Freshwater	B3	sed/pw	5.75	8957.85
Freshwater	B3	sed/pw	6.25	9146.88	6.5	9759.95		498.732	15357.5	7.2823	83.8122	3.18479	6.76	2108.88	1340.23	7	2863.35	41.085	170.033	6896.84	17.451	31.146
Freshwater	B3	sed/pw	6.75	10373
